# Supplementary material for: Accurate imputation of human leukocyte antigens with CookHLA
Source: PubMed Central journal article supplement (PMC7904773; doi:10.1038/s41467-021-21541-5), 2021-02-24

## Supplementary Information

### Accurate Imputation of Human Leukocyte Antigens with CookHLA

**Supplementary Table 1. Accuracy comparison of different versions of CookHLA.** We imputed HapMap CEU (N=88) using the T1DGC (N=5,225) as reference. The version with the best accuracy is in bold font.

|  |                              | CookHLA versions  |                 |               |                |               |               |
|--|------------------------------|-------------------|-----------------|---------------|----------------|---------------|---------------|
|  |                              | Equiv. to SNP2HLA | CookHLA-vanilla | CookHLA-embed | CookHLA-HapMap | CookHLA-adapt | Full CookHLA  |
|  | Upgraded Hidden Markov model | X                 | O               | O             | O              | O             | O             |
|  | Genetic map                  | Not applicable    | No map          | No map        | HapMap map     | Adaptive map  | Adaptive map  |
|  | Local embedding of markers   | X                 | X               | O             | X              | X             | O             |
|  | <i>HLA-A</i>                 | 92.05%            | 97.16%          | 97.16%        | 96.59%         | <b>98.86%</b> | <b>98.86%</b> |
|  | <i>HLA-C</i>                 | 93.75%            | <b>98.30%</b>   | <b>98.30%</b> | <b>98.30%</b>  | 97.73%        | <b>98.30%</b> |
|  | <i>HLA-B</i>                 | 92.05%            | <b>97.16%</b>   | <b>97.16%</b> | <b>97.16%</b>  | <b>97.16%</b> | <b>97.16%</b> |
|  | <i>HLA-DRB1</i>              | 90.34%            | 93.18%          | 93.75%        | 93.75%         | 94.32%        | <b>94.89%</b> |
|  | <i>HLA-DQA1</i>              | 97.73%            | 98.86%          | <b>99.43%</b> | <b>99.43%</b>  | <b>99.43%</b> | <b>99.43%</b> |
|  | <i>HLA-DQB1</i>              | 94.89%            | <b>97.16%</b>   | <b>97.16%</b> | <b>97.16%</b>  | <b>97.16%</b> | <b>97.16%</b> |
|  | Average                      | 93.47%            | 96.97%          | 97.16%        | 97.06%         | 97.44%        | <b>97.63%</b> |

**Supplementary Table 2. Pairwise accuracy benchmark using 10 reference panels.** We collected 10 different reference panels of various populations and sizes, and tested each pair by assigning one as a reference and another as a target. The imputation accuracy was averaged

over all available HLA genes for each pair. In each cell, the first number is the accuracy of the full version of CookHLA, while the number in the parentheses is the accuracy of CookHLA-vanilla (CookHLA with only imputation engine upgrade, no genetic map is used).

|               |           | Reference panel |             |             |             |             |                |                |             |             |                   |
|---------------|-----------|-----------------|-------------|-------------|-------------|-------------|----------------|----------------|-------------|-------------|-------------------|
|               |           | European        |             |             | East Asian  |             |                | South Asian    |             | African     | Ad Mixed American |
|               |           | T1DGC           | 58BC        | 1000G EUR   | Chinese     | Korean      | 1000G EAS      | Pan-Asian      | 1000G SAS   | 1000G AFR   | 1000G AMR         |
| Target sample | T1DGC     |                 | 91.3 (90.8) | 93.3 (89.8) | 80.4 (71.2) | 75.1 (65.4) | 73.0 (59.6)    | 78.7 (71.6)    | 85.1 (73.2) | 88.7 (78.9) | 91.0 (83.4)       |
|               | 58BC      | 97.5 (97.4)     |             | 96.8 (94.4) | 89.1 (85.1) | 81.5 (72.7) | 75.6 (63.0)    | 74.1 (69.1)    | 80.6 (78.0) | 92.0 (80.2) | 94.9 (88.2)       |
|               | 1000G EUR | 98.3 (97.5)     | 95.8 (94.4) |             | 89.4 (85.6) | 81.0 (76.6) | 82.8 (72.0)    | 76.0 (71.1)    | 85.3 (78.7) | 91.1 (86.2) | 95.6 (88.1)       |
|               | Chinese   | 80.8 (79.0)     | 69.0 (63.4) | 73.2 (65.1) |             | 90.5 (82.2) | 92.3 (83.5)    | 89.2 (83.5)    | 80.3 (71.6) | 58.4 (51.1) | 68.4 (62.0)       |
|               | Korean    | 90.0 (87.1)     | 71.9 (67.7) | 74.0 (68.6) | 95.4 (94.7) |             | 95.2 (83.6)    | 90.6 (83.6)    | 77.9 (66.3) | 61.9 (54.6) | 71.3 (64.9)       |
|               | 1000G EAS | 91.3 (80.6)     | 61.2 (51.7) | 68.8 (62.6) | 94.4 (94.1) | 90.8 (82.5) |                | Sample overlap | 78.9 (74.8) | 57.9 (50.5) | 63.8 (60.5)       |
|               | Pan-Asian | 90.0 (89.8)     | 61.0 (60.0) | 64.3 (61.8) | 87.5 (88.9) | 78.4 (75.6) | Sample overlap |                | 83.8 (74.6) | 58.1 (51.0) | 59.9 (54.4)       |
|               | 1000G SAS | 94.0 (90.5)     | 78.2 (74.0) | 82.9 (73.4) | 88.5 (82.3) | 79.5 (73.8) | 87.0 (81.8)    | 88.7 (81.8)    |             | 74.9 (62.8) | 79.4 (68.2)       |
|               | 1000G AFR | 89.3 (84.4)     | 68.9 (62.5) | 74.8 (67.8) | 59.1 (57.5) | 45.0 (39.8) | 50.2 (42.8)    | 47.6 (38.3)    | 53.3 (45.0) |             | 85.9 (67.7)       |
|               | 1000G AMR | 89.3 (88.4)     | 78.9 (78.2) | 82.7 (77.5) | 77.0 (76.0) | 67.0 (61.4) | 68.7 (62.4)    | 64.8 (58.7)    | 72.4 (64.7) | 80.0 (73.7) |                   |

**Supplementary Table 3. Computation time of different methods.** We used 2.1Ghz CPU cores with 8Gb memory per core. The computation time for obtaining adaptive genetic map using MACH is described in parenthesis for CookHLA.

|                                                                             | SNP2HLA    | CookHLA<br>(Beagle v4.1) |                         | CookHLA<br>(Beagle v5.1) |                       | HIBAG-prefit |         |
|-----------------------------------------------------------------------------|------------|--------------------------|-------------------------|--------------------------|-----------------------|--------------|---------|
| Custom reference adaptability                                               | O          | O                        |                         | O                        |                       | X            |         |
| CPU core usage (# thread)                                                   | 1          | 1                        | 9                       | 1                        | 9                     | 1            | 7       |
| Memory assigned                                                             | 8Gb        | 8Gb                      | 72Gb                    | 8Gb                      | 72Gb                  | 8Gb          | 56Gb    |
| T1DGC ref (N=5,225) /<br>1000G EUR (N=503)<br>(# Overlap SNP = 5,539)       | 2.0 hours  | 19.4 hours<br>(+ 42mins) | 2.6 hours<br>(+ 42mins) | 1.4 hours<br>(+ 42mins)  | 10 mins<br>(+ 42mins) | 34 mins      | 10 mins |
| Chinese ref (N=9,773) /<br>Korean target (N=413)<br>(# Overlap SNP = 3,595) | 33.2 hours | 29.1 hours<br>(+ 31mins) | 4.5 hours<br>(+ 31mins) | 1.4 hours<br>(+ 31mins)  | 11 mins<br>(+ 31mins) | 11 mins      | 3 mins  |

**Supplementary Figure 1. Imputation accuracy comparison in Asians.** Accuracies were measured based on matching in 4-digit level. We evaluated prediction accuracy in imputing HLA of Koreans (N = 413) using the merged panel of Chinese (N = 9,773) and HapMap EAS (N = 504) as reference. For HIBAG-prefit, we used the Asian prefit model. The error bars represent SD.

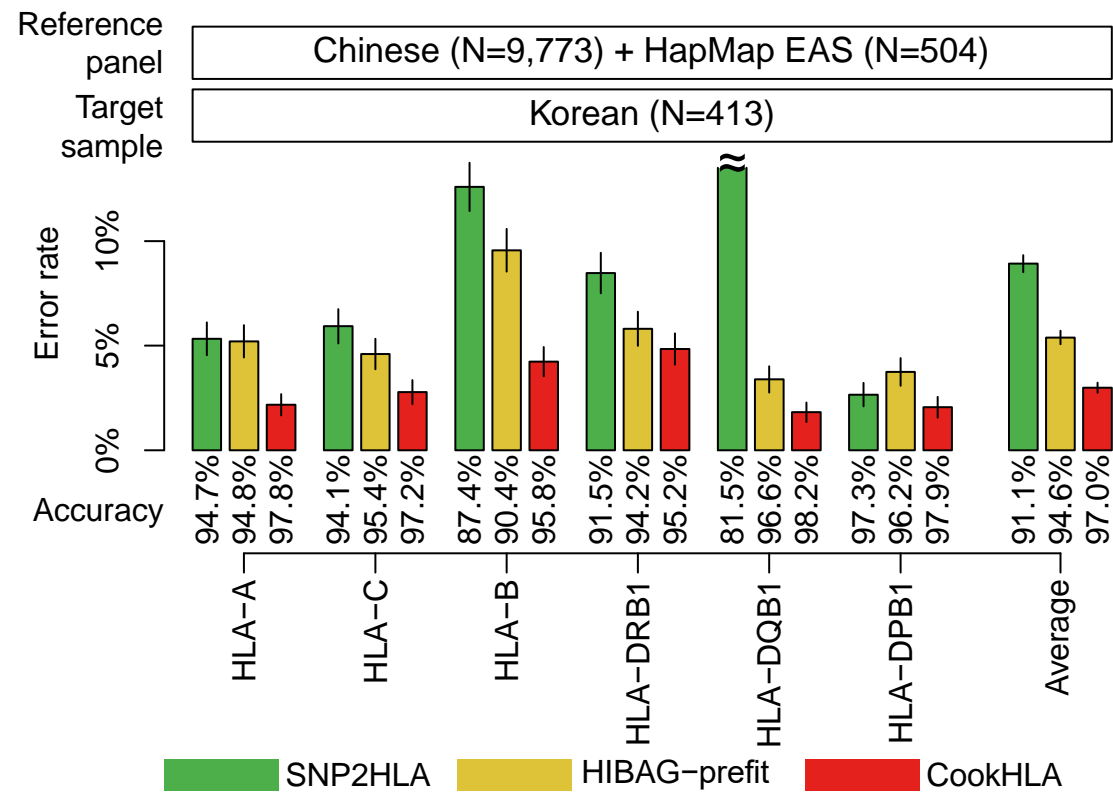

**Supplementary Figure 2. Pairwise comparison across 10 different reference panels.** We collected 10 reference panels of differing ethnicities and sizes. We then tested every possible pair by assigning one panel as reference and another as target, which comprised 88 tests after excluding overlapping sample pairs. **(a)** We compared the full version of CookHLA to CookHLA-vanilla (upgraded engine only) and **(b)** CookHLA-HapMap (upgraded engine, with HapMap genetic map) to CookHLA-vanilla. The dotted line indicates where the two methods' imputation accuracies are equal.

**a.**

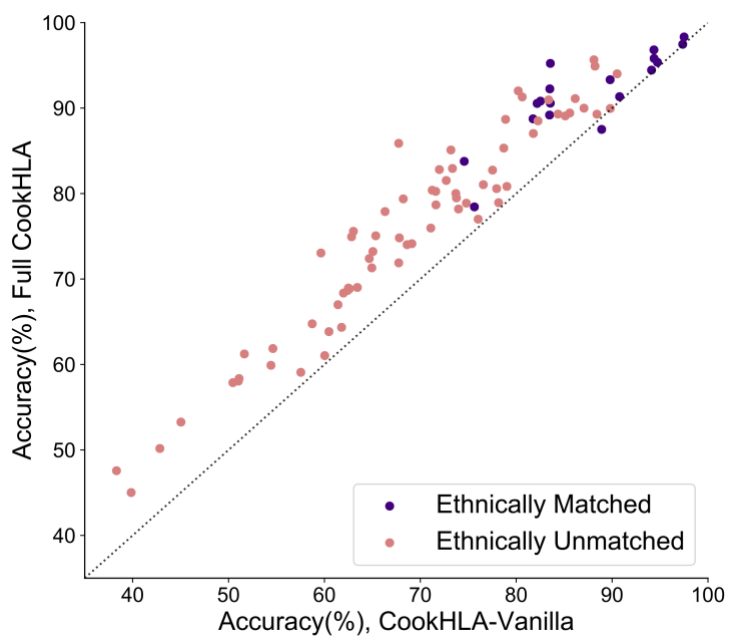

**b.**

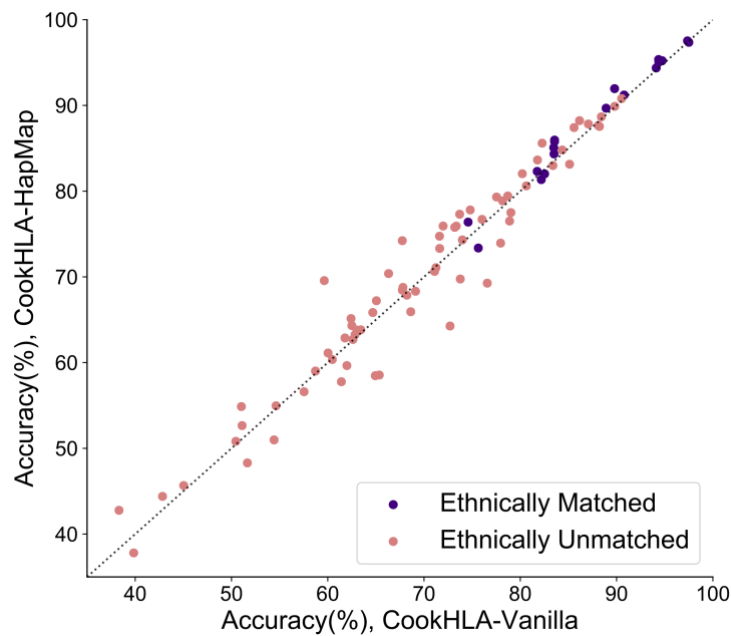

**Supplementary Figure 3. Imputation accuracy of different versions of CookHLA in each allele frequency bin. (a)** We used cross-validation by splitting the T1DGC panel into reference (N=1,000) and the target sample (N=4,225). **(b)** We used the 1000G EAS (N=504) as reference and the Korean data (N=413) as target. The accuracy refers to sensitivity.

**a.**

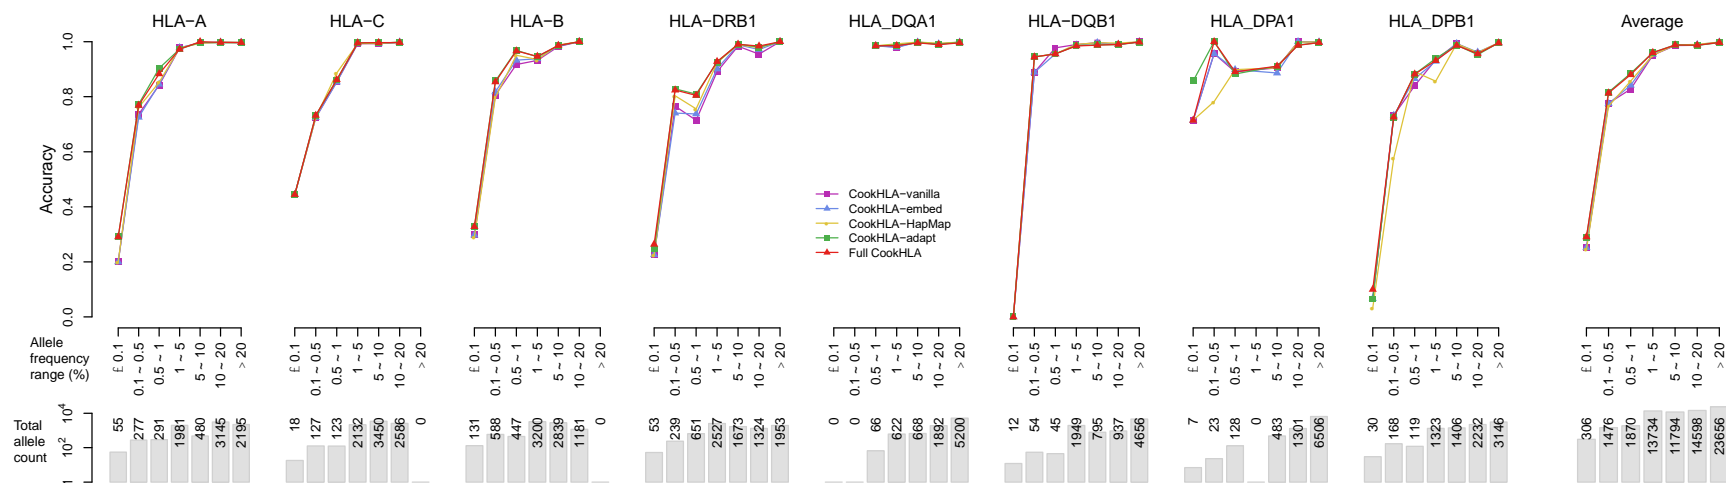



**Supplementary Figure 4. Imputation accuracy (PPV, F1-score) in each allele frequency bin.** We used cross-validation by splitting the T1DGC panel into reference (N=1,000) and the target sample (N=4,225). For HIBAG-prefit, we used the European prefit model. **(a)** PPV in each allele frequency bin. We omitted alleles with predicted allele counts of zero. **(b)** F1-score in each allele frequency bin. F1-score was defined as the harmonic mean of the sensitivity in Figure 4 and PPV. Only the alleles with non-zero sensitivity and PPV were included for calculation.

**a.**

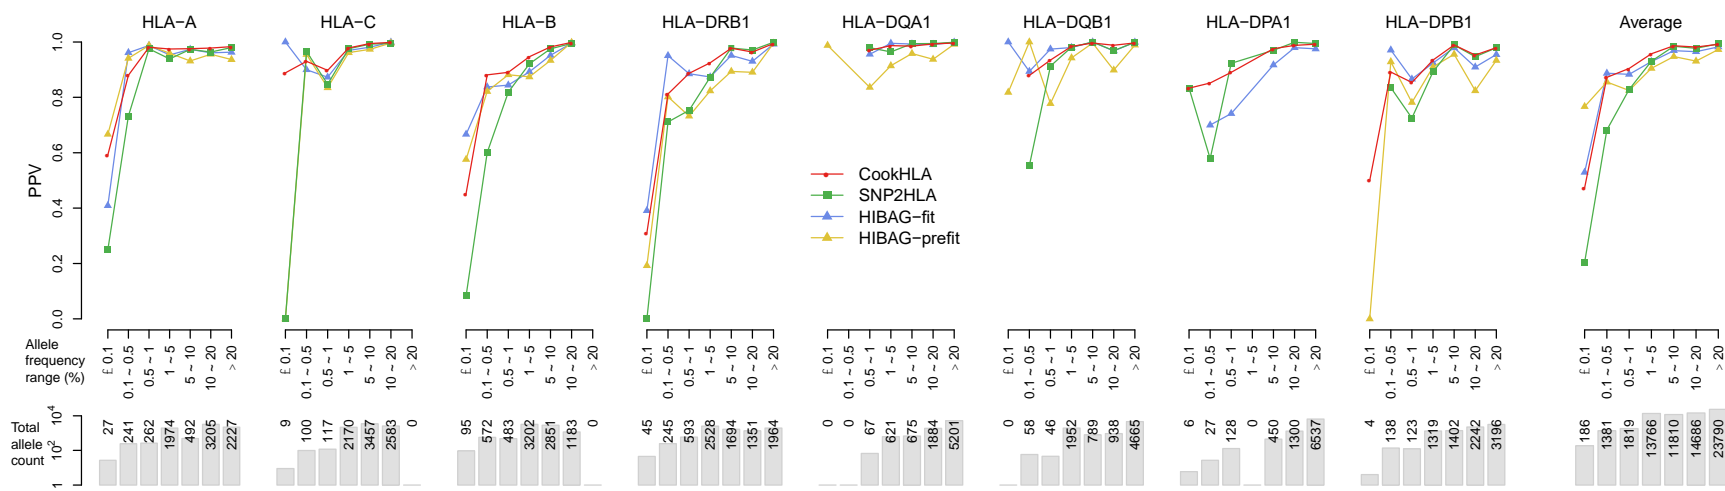



**b.**

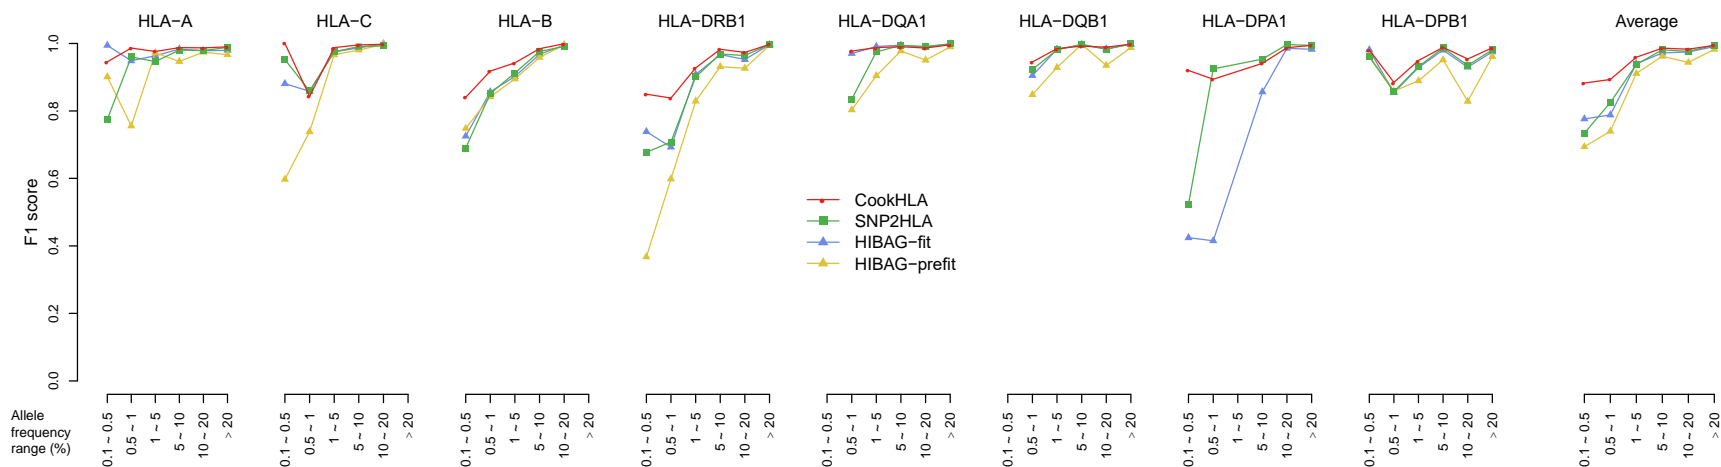

**Supplementary Figure 5. Imputation accuracy versus call rate.** For each method, we changed the threshold to call genotypes based on the confidence score provided by the method. We used the T1DGC subset (N=1,000) as reference and the rest (N=4,225) as target, similar to **Figure 2C**. The imputation accuracy was averaged over all available HLA genes. (In SNP2HLA, *HLA-DPA1* was excluded because there was a phenomenon that all 4 digit markers show 0 posterior probabilities in this dataset.)

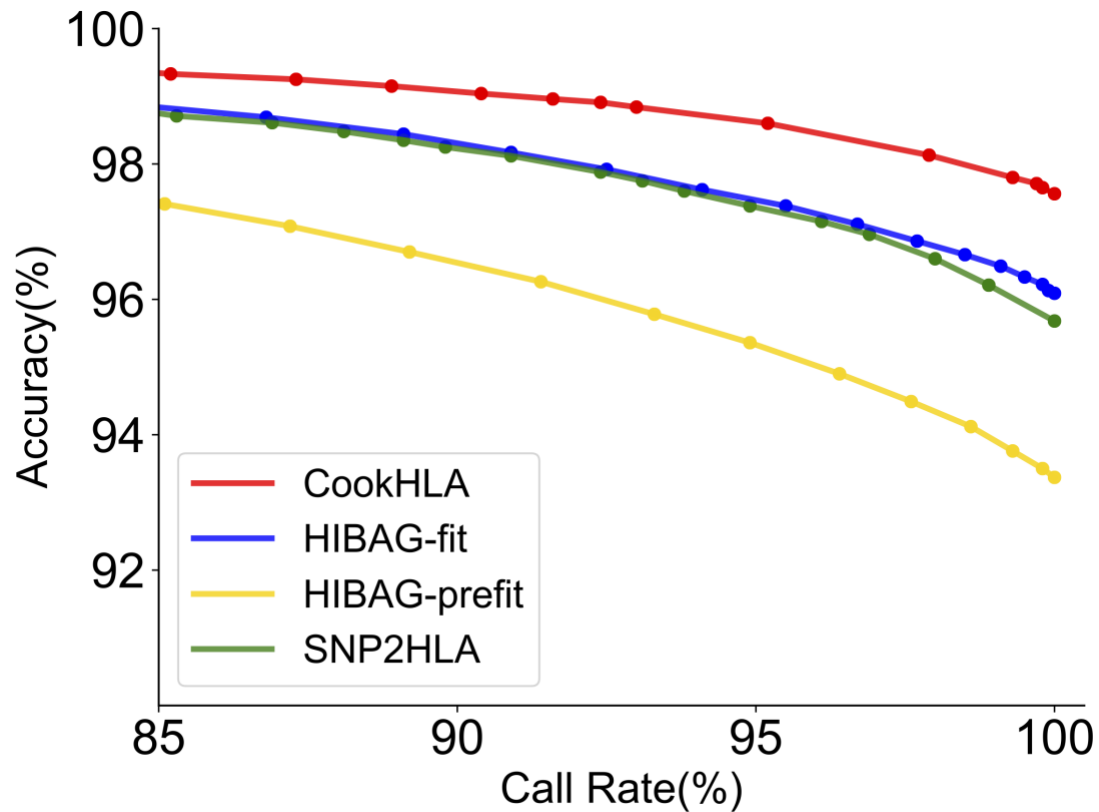

Supplement: 41467_2021_21541_MOESM1_ESM.pdf [file 41467_2021_21541_MOESM1_ESM.pdf]
